# Supplementary material for: Anti-LRP2 Nephropathy
Source: PubMed Central journal article supplement — Kidney Int Rep. 2020 Sep 12;5(12):2365–70. doi: 10.1016/j.ekir.2020.09.011 (PMC7710829; doi:10.1016/j.ekir.2020.09.011), 2020-09-12
Supplement: mmc1.pdf [file mmc1.pdf]

## Supplementary File 1: Detailed Methods

### A. Anti-Brush Border Antibody (ABBA) Detection on Normal Human Kidney Frozen Tissue Sections by Indirect Immunofluorescence

The patient serum was incubated for 30 minutes at room temperature on acetone fixed frozen normal human kidney sections. After incubation with the patient's serum, specific binding of the IgG antibody in the serum to the brush border was detected by incubating the sections for 30 minutes at room temperature with FITC- labeled goat anti-Human IgG (H & L) diluted 1:80 (MP Biomedicals, Solon, OH). The final titer of the ABBA was 1:640.

### B. Colocalization of LDL Receptor-Related Protein 2 (Megalin) and IgG ABBA in the Patient's Serum

Acetone fixed frozen tissue sections of normal human kidney were double stained by multi-step indirect immunofluorescence first using a 1:50 dilution of the patient serum for 30 minutes at room temperature then incubated with FITC-labeled goat anti-human IgG (H & L) diluted 1:80 (MP Biomedicals, Solon, OH) for one hour at room temperature. Slides were then blocked sequentially with first with Avidin (10 mcg/ml) for 30 minutes and then with Biotin (100 mcg/ml). The frozen sections were then incubated with a polyclonal rabbit antibody against the C-terminal portion of the human LRP2 protein (Megalin); (amino acids 4447-4655 Abcam, Cambridge, MA) diluted 1:100. Specific binding of the megalin antibody to the brush border was detected by incubating the sections with biotinylated-goat anti-rabbit IgG (H & L Vector Laboratories, Burlingame, CA) 1:100 dilution for one hour. Then by incubation with Cy3-streptavidin (Vector Laboratories, Burlingame, CA) 1:25 dilution for one hour. The megalin antibody showed strong positive staining to the brush border which colocalized with the staining of the IgG antibody in the patient's serum. Colocalization of the IgG and the anti-LRP2 was examined also by confocal microscopy.

### C. ABBA Immunoprecipitation

Reactive or nonreactive human serum was incubated with human tubular extract, immunoprecipitated with immobilized Protein G Plus (Santa Cruz Sc-2002), electrophoresed in the presence of a reducing agent, and blotted with Rabbit anti-LDL receptor related protein 2 (LRP2) antibodies (Sigma HPA064792). We would like to acknowledge New England Donor Services and the families of the donors who provided their kidneys for research, as such kidneys were used for the preparation of the human tubular extract.

## Supplemental References

- S1. Dhingra S, Qureshi R, Abdellatif A, *et al.* Tubulointerstitial nephritis in systemic lupus erythematosus: innocent bystander or ominous presage. *Histol Histopathol* 2014; **29**: 553-565.
- S2. Singh AK, Ucci A, Madias NE. Predominant tubulointerstitial lupus nephritis. *Am J Kidney Dis* 1996; **27**: 273-278.
- S3. Mori Y, Kishimoto N, Yamahara H, *et al.* Predominant tubulointerstitial nephritis in a patient with systemic lupus nephritis. *Clin Exp Nephrol* 2005; **9**: 79-84.
- S4. Deshpande V, Zen Y, Chan JK, *et al.* Consensus statement on the pathology of IgG4-related disease. *Mod Pathol* 2012; **25**: 1181-1192.
- S5. Kamisawa T, Zen Y, Pillai S, *et al.* IgG4-related disease. *Lancet* 2015; **385**: 1460-1471.
- S6. Alexander MP, Larsen CP, Gibson IW, *et al.* Membranous glomerulonephritis is a manifestation of IgG4-related disease. *Kidney Int* 2013; **83**: 455-462.
- S7. Vaseemuddin M, Schwartz MM, Dunea G, *et al.* Idiopathic hypocomplementemic immune-complex-mediated tubulointerstitial nephritis. *Nat Clin Pract Nephrol* 2007; **3**: 50-58.
- S8. Dinesh KP, Raniele D, Michels K, *et al.* Anti-LRP2 Nephropathy With Abundant IgG4-Positive Plasma Cells: A Case Report. *Am J Kidney Dis* 2019; **74**: 132-137.
- S9. Caliskan Y, Caza T, Mosman A, *et al.* A case of immune complex mediated tubulointerstitial disease and nephrotic syndrome: anti LRP-2 Nephropathy with diffuse podocyte effacement. *J Nephrol* 2020.
- S10. Campbell RE, Uhlenhopp D, Shaw M, *et al.* Anti-Brush Border Antibody Associated Renal Disease (ABBA). *Qjm* 2020.
- S11. Gamayo A, Hecox D, Dicker L, *et al.* Anti-LRP2 nephropathy with concurrent kidney infiltration by lymphoma. *Clin Kidney J* 2020; **13**: 468-472.
- S12. Morrison EB, Kozlowski EJ, McPhaul JJ, Jr. Primary tubulointerstitial nephritis caused by antibodies to proximal tubular antigens. *Am J Clin Pathol* 1981; **75**: 602-609.

- S13. Douglas MF, Rabideau DP, Schwartz MM, *et al.* Evidence of autologous immune-complex nephritis. *N Engl J Med* 1981; **305**: 1326-1329.
- S14. Nielsen R, Christensen EI, Birn H. Megalin and cubilin in proximal tubule protein reabsorption: from experimental models to human disease. *Kidney Int* 2016; **89**: 58-67.
- S15. Kerjaschki D, Farquhar MG. The pathogenic antigen of Heymann nephritis is a membrane glycoprotein of the renal proximal tubule brush border. *Proc Natl Acad Sci U S A* 1982; **79**: 5557-5561.
- S16. Kerjaschki D, Farquhar MG. Immunocytochemical localization of the Heymann nephritis antigen (GP330) in glomerular epithelial cells of normal Lewis rats. *J Exp Med* 1983; **157**: 667-686.
- S17. Kerjaschki D, Horvat R, Binder S, *et al.* Identification of a 400-kd protein in the brush borders of human kidney tubules that is similar to gp330, the nephritogenic antigen of rat Heymann nephritis. *Am J Pathol* 1987; **129**: 183-191.
- S18. Buglioni A AM, Hernandez LH, Fidler M, Nasr S, Sethi S, Said S, Grande J, Hogan M, Cornell L. A Large Cohort of IgG4-Related Kidney Disease (IgG4-RKD). *Modern Pathology, Abstract from USCAP 2019, National Harbor, MD* 2019; **32**: 1-36.
- S19. González-Cabrero J, de Nicolas R, Ortíz A, *et al.* Presence of circulating antibodies against brush border antigens (Fx1A) in a patient with membranous nephropathy and bilateral pyeloureteral stenosis. Comparison with idiopathic membranous nephropathy. *Nephrol Dial Transplant* 1992; **7**: 293-299.
- S20. Skogh T, Heuman R, Tagesson C. Anti-brush border antibodies (ABBA) in Crohn's disease. *J Clin Lab Immunol* 1982; **9**: 147-150.
- S21. Skogh T, Bodemar G, Kihlström E, *et al.* Anti-brush border antibodies (ABBA) in sera from patients with ulcerative proctocolitis and in sera with antibodies against *Yersinia enterocolitica* 0:3. *J Clin Lab Immunol* 1986; **19**: 117-118.
- S22. Marinò M, Chiovato L, Friedlander JA, *et al.* Serum antibodies against megalin (GP330) in patients with autoimmune thyroiditis. *J Clin Endocrinol Metab* 1999; **84**: 2468-2474.
- S23. Ooka S, Matsui T, Nishioka K, *et al.* Autoantibodies to low-density-lipoprotein-receptor-related protein 2 (LRP2) in systemic autoimmune diseases. *Arthritis Res Ther* 2003; **5**: R174-180.
